# Supplementary material for: Mechanism of Brevibacillus brevis strain TR-4 against leaf disease of Photinia×fraseri Dress
Source: PeerJ. 2024 Jun 25;12:e17568. doi: 10.7717/peerj.17568 (PMC11212632; doi:10.7717/peerj.17568)
Supplement: Supplemental Information 2 — There were an average of 50 spores in the 40× objective field. [file peerj-12-17568-s002.xlsx]

## Sheet: Sheet1
	12h	24h	36h
Ck	15/50	40/50	49/50
EC50	3/50	12/50	16/50
10EC50	0/50	8/50	12/50
EC90	0/50	1/50	4/50
