# Supplementary material for: Mechanism of Brevibacillus brevis strain TR-4 against leaf disease of Photinia×fraseri Dress
Source: PeerJ. 2024 Jun 25;12:e17568. doi: 10.7717/peerj.17568 (PMC11212632; doi:10.7717/peerj.17568)
Supplement: Supplemental Information 3 [file peerj-12-17568-s003.xlsx]

## Sheet: Sheet1
	Repeat 1	Repeat 2	Repeat 3
Control	38.22mm	38.43mm	38.21mm
0.001	23.73mm	23.32mm	23.43mm
0.01	21.23mm	21.22mm	20.98mm
0.1	10.25mm	10.22mm	10.42mm
1	8.43mm	8.73mm	8.64mm
10	7.32mm	7.43mm	7.36mm
